# Supplementary material for: Exploring the impact of shielding advice on the health and wellbeing of individuals identified as extremely vulnerable and advised to shield in Southwest England amid the COVID-19 pandemic: A mixed-methods evaluation
Source: bioRxiv or medRxiv preprint supplement (doi:10.1101/2022.01.05.21268251), 2022-01-05
Supplement: Supplementary file [file media-1.pdf]

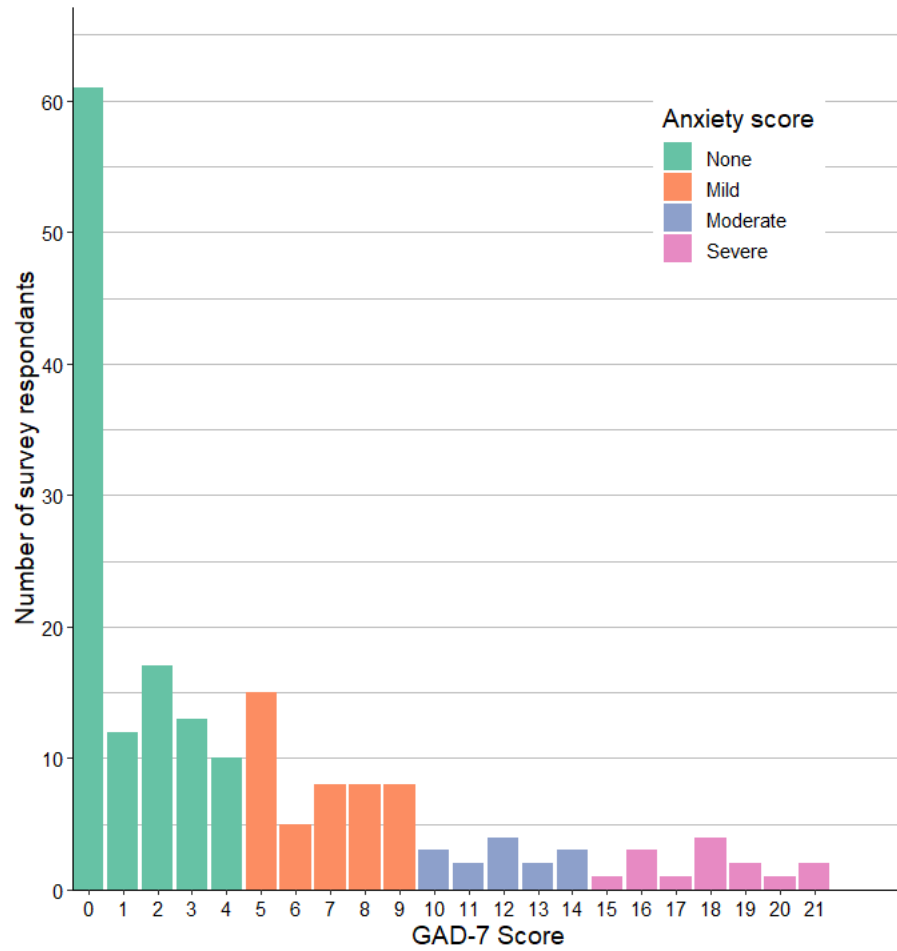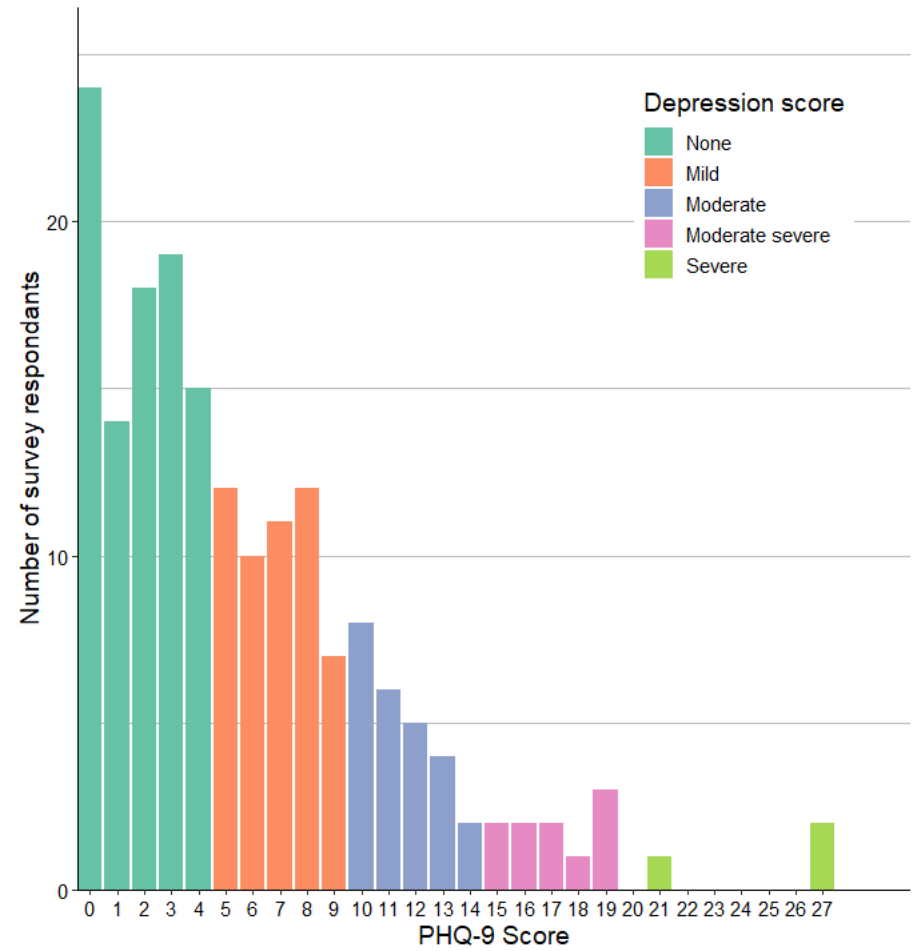

**Figure 1: Survey results for the (A) GAD-7 and (B) PHQ-9 questionnaires** (Categories indicated in the key are as follows. For the GAD-7 cut-off values used: None = 0-4; Mild = 5-9; Moderate = 10-14; Severe = 15-21. For the PHQ-9 cut-off values used were: None = 0-4; Mild = 5-9; Moderate = 10-14; Moderate severe = 15-19; Severe = 15-19. For both questionnaires a cut-off of 10 was used to indicate possible anxiety or depression, respectively.)
